# Supplementary material for: Field-assisted slow relaxation of magnetization in Cu(ii) complexes with pentaheterocyclic triphenodioxazine ligands: the quasi-one-dimensional versus the binuclear case
Source: Royal Society of Chemistry journal article supplement (doi:10.1039/d3nj04614a), 2023-01-01
Supplement: d3nj04614a1.pdf [file d3nj04614a1.pdf]

## Supporting information

### **Field-assiated slow relaxation of magnetization in Cu(II) complexes with a pentaheterocyclic triphenodioxazine ligands: quasi-one-dimensional versus binuclear case**

D.V. Korchagin,<sup>\*a</sup> E.P. Ivakhnenko,<sup>b</sup> O.P. Demidov,<sup>c</sup> P.A. Knyazev<sup>b</sup>, N.N. Efimov,<sup>d</sup>  
R.B. Morgunov,<sup>a</sup> A.G. Starikov,<sup>b</sup> A.V. Paliy,<sup>a</sup> V.I. Minkin,<sup>b</sup> and S.M. Aldoshin<sup>a</sup>

<sup>a</sup> *Federal Research Center of Problems of Chemical Physics and Medicinal Chemistry, Russian Academy of Sciences, 1 Acad. Semenov Av., 142432 Chernogolovka, Russia; korden@icp.ac.ru*

<sup>b</sup> *Institute of Physical and Organic Chemistry, Southern Federal University. 194/2 Stachki St. Rostov on Don, Russian Federation, 344090*

<sup>c</sup> *North Caucasus Federal University. 1 Pushkin st., Stavropol, Russian Federation, 355017*

<sup>d</sup> *Kurnakov Institute of General and Inorganic Chemistry, 31 Leninskii prosp. Moscow, Russian Federation, 119071,*

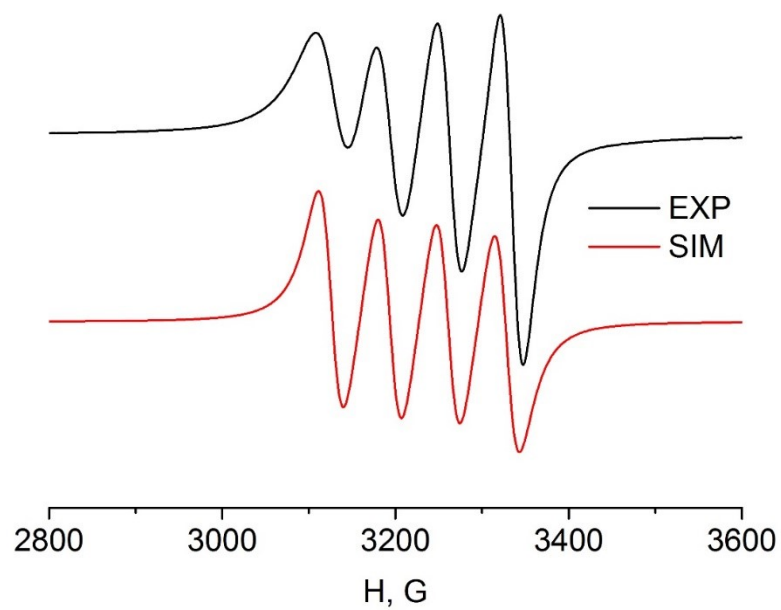

**Fig. S1.** Experimental (black) and simulated (red) ESR spectra of  $\text{Cu}(\text{hfac})_2$  (toluene solution, 295K,  $g = 2.1352$ ,  $a(\text{Cu}) = 67.45$  G).

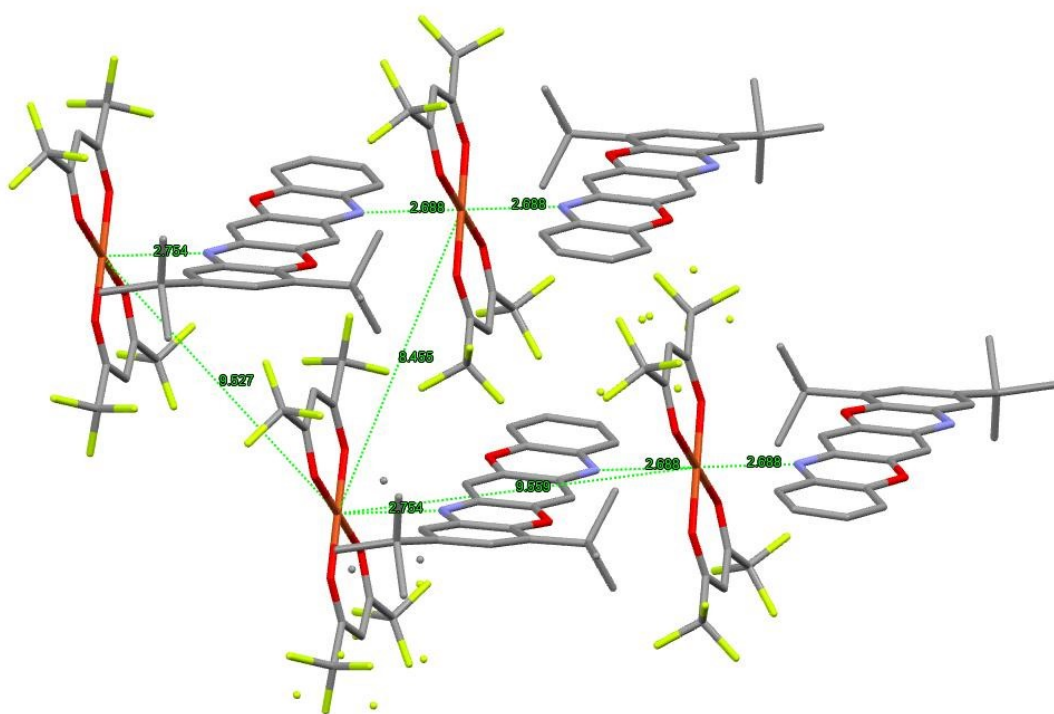

(a)

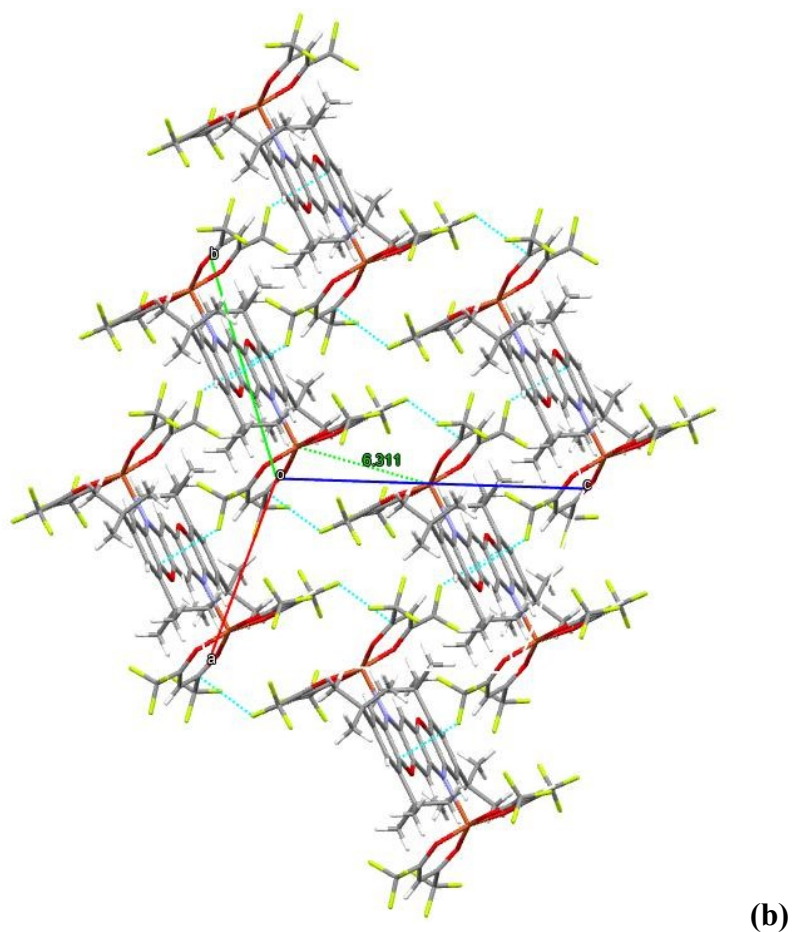

**Fig.S2.** Fragments of crystal packing of **1** (a) and **2**(b)

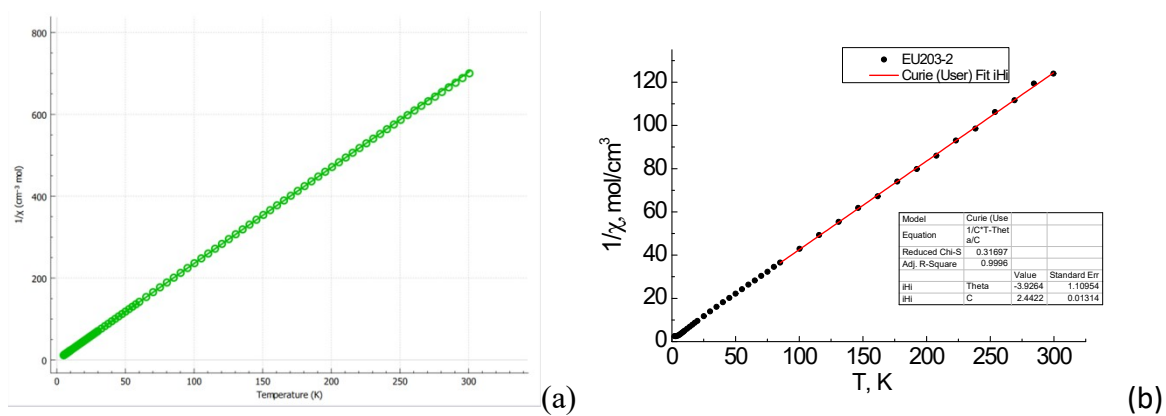

**Fig. S3.**  $\chi^{-1}(T)$  dependences for **1** (a) and **2** (b) ( $H = 1$  and  $5$  kOe, respectively).

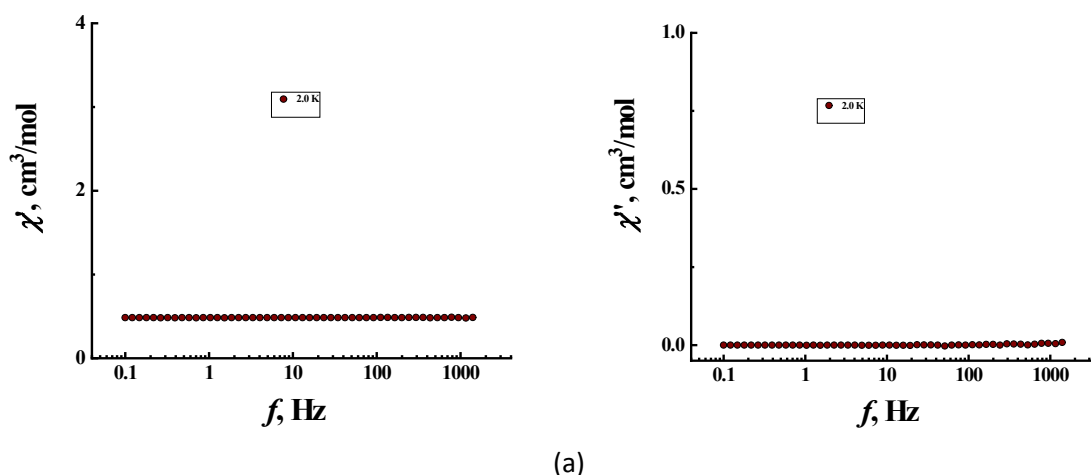

**Fig. S4.** Frequency dependence of the in-phase  $\chi'$  (a), out-of-phase  $\chi''$  (b) AC susceptibility  $\chi_M$  for **1** at temperature  $T = 2\text{ K}$  and  $H_{DC} = 0\text{ Oe}$ .

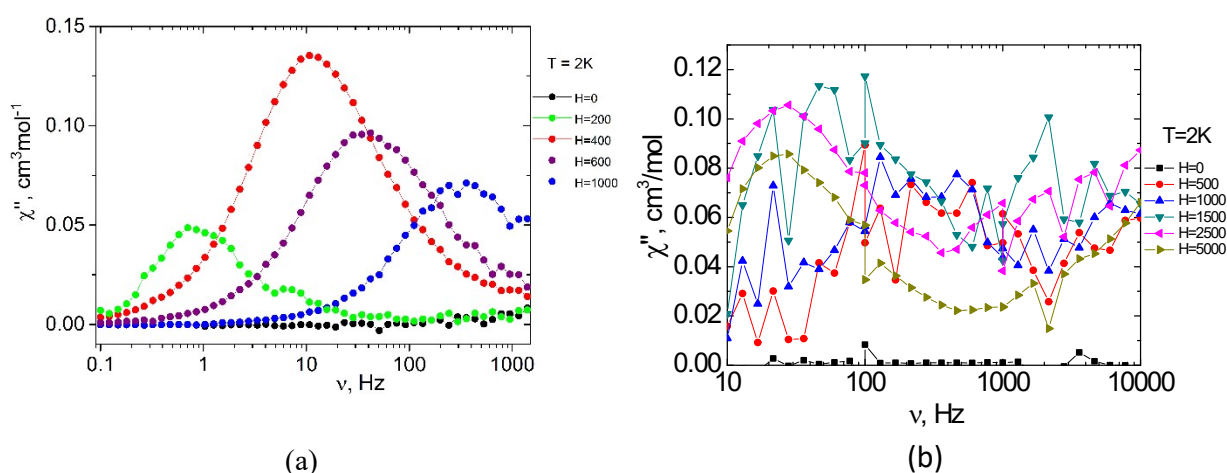

**Fig. S5.** Frequency dependences of the out-of-phase ( $\chi''$ ) AC susceptibility for **1** (a) and **2** (b) at different values of applied DC magnetic field and  $T = 2\text{ K}$ .

**Table S1.** Crystal data and structure refinement for **1** and **2**.

| Parameters                  | <b>1</b>                                                        | <b>2</b>                                                                    |
|-----------------------------|-----------------------------------------------------------------|-----------------------------------------------------------------------------|
| Empirical formula           | $\text{C}_{36}\text{H}_{28}\text{CuF}_{12}\text{N}_2\text{O}_6$ | $\text{C}_{54}\text{H}_{46}\text{Cu}_2\text{F}_{24}\text{N}_2\text{O}_{10}$ |
| Formula weight, g/mol       | 876.14                                                          | 1466.01                                                                     |
| Temperature, K              | 293(1)                                                          | 100(1)                                                                      |
| Crystal system; space group | Triclinic; P-1                                                  | Triclinic; P-1                                                              |
| $a$ , Å                     | 9.5270(2)                                                       | 9.3736(5)                                                                   |
| $b$ , Å                     | 13.6628(3)                                                      | 13.0106(6)                                                                  |
| $c$ , Å                     | 15.3279(2)                                                      | 13.5156(7)                                                                  |
| $\alpha$ , deg.             | 91.565(2)                                                       | 99.681(4)                                                                   |
| $\beta$ , deg.              | 97.827(2)                                                       | 103.799(4)                                                                  |
| $\gamma$ , deg.             | 106.988(2)                                                      | 107.618(4)                                                                  |

|                                                             |                    |                    |
|-------------------------------------------------------------|--------------------|--------------------|
| Volume, Å <sup>3</sup>                                      | 1885.58(7)         | 1473.32(14)        |
| Z; ρ (calculated), g/cm <sup>3</sup>                        | 2; 1.543           | 2; 1.651           |
| μ, mm <sup>-1</sup>                                         | 1.789              | 2.115              |
| F(000)                                                      | 886                | 738                |
| Crystal size, mm                                            | 0.29 x 0.18 x 0.05 | 0.24 x 0.17 x 0.11 |
| θ range, deg.                                               | 2.917 to 67.684    | 3.487 to 67.684    |
| Reflections collected                                       | 39179              | 24302              |
| Reflections unique [R(int)]                                 | 7869 [0.0188]      | 6115 [0.0589]      |
| N of param. (Constraints)                                   | 666(36)            | 421(0)             |
| Goodness-of-fit on F <sup>2</sup>                           | 1.074              | 1.028              |
| Final R <sub>1</sub> ; wR <sub>2</sub> [I > 2σ(I)]          | 0.0386; 0.1177     | 0.0489; 0.1291     |
| R <sub>1</sub> ; wR <sub>2</sub> (all data)                 | 0.0458; 0.1269     | 0.0546; 0.1373     |
| Δρ <sub>max</sub> and Δρ <sub>min</sub> , e·Å <sup>-3</sup> | 0.280 and -0.505   | 0.936 and -0.731   |
| CCDC                                                        | 2296209            | 2296208            |

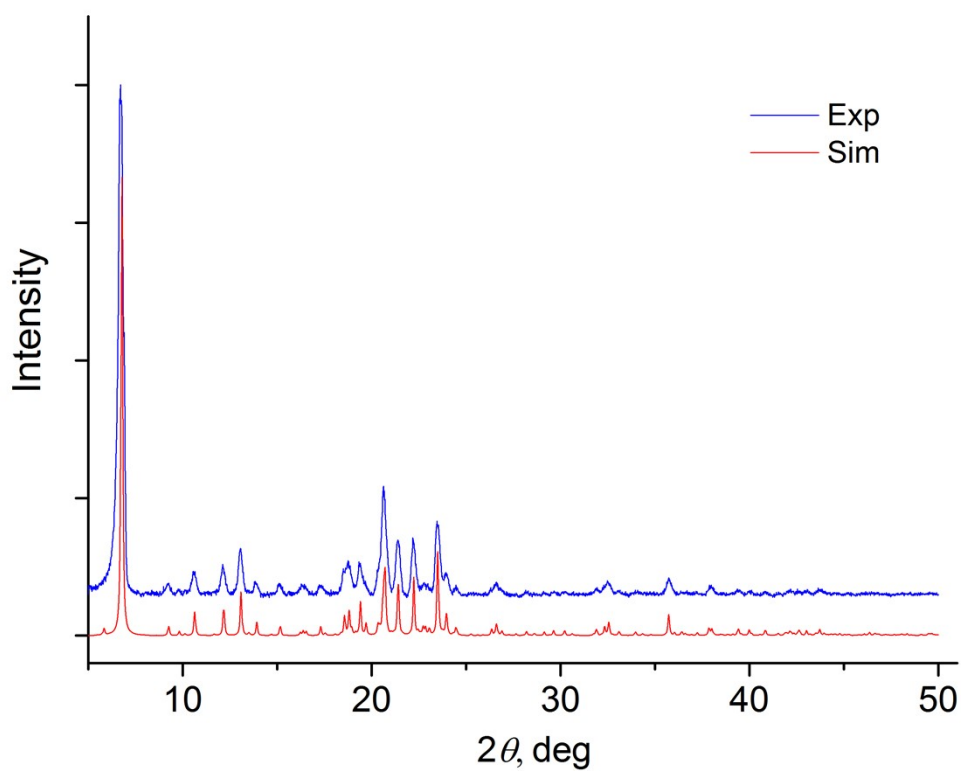

(a)

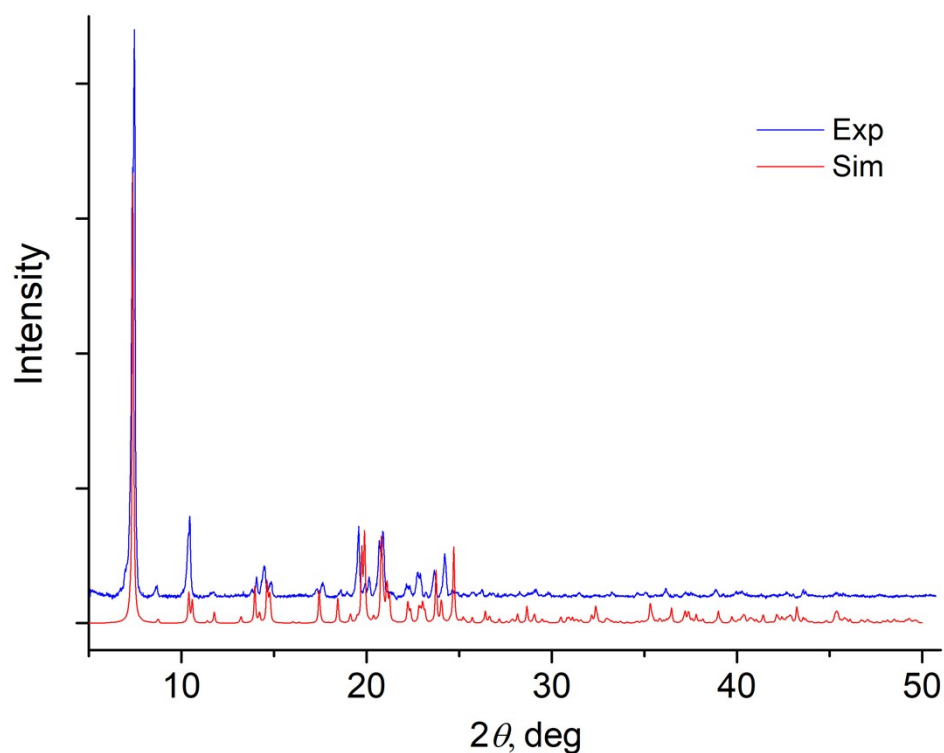

(b)

**Fig. S6.** Powder X-ray diffraction pattern of polycrystalline sample of **1** (a) and **2** (b): experimental (blue), and calculated from single crystal data (red).

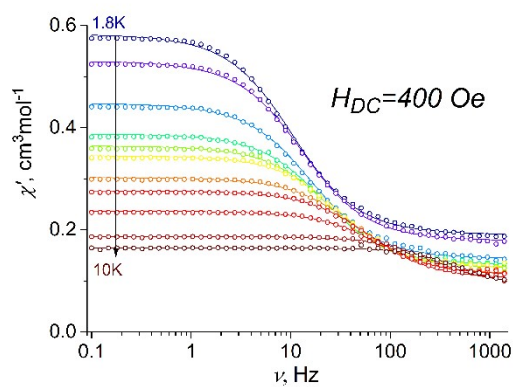

(a)

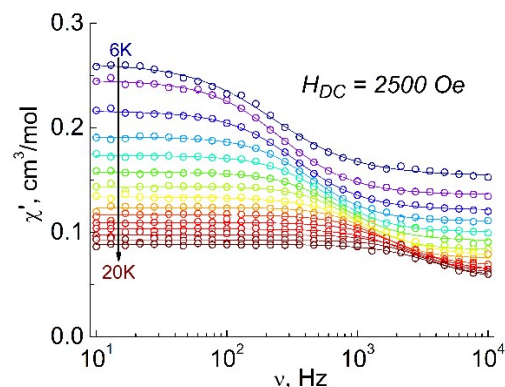

(b)

**Fig. S7.** Frequency dependences of the in-phase  $\chi'$  for **1** (a) and **2** (b) at different temperatures and  $H_{DC}=400$  Oe and 2500 Oe, respectively (points – experiment, lines – fit by generalized Debye model).

**Table S2.** Best fit parameters of the one-component Debye model for the Cole-Cole plot of complex **1** at  $H_{DC}=400$  Oe

| $T, K$ | $\chi_S, \text{cm}^3 \text{mol}^{-1}$ | $\chi_T, \text{cm}^3 \text{mol}^{-1}$ | $\tau, s$ | $\alpha$ | $R_1^a$   |
|--------|---------------------------------------|---------------------------------------|-----------|----------|-----------|
| 1.8    | 0.190                                 | 0.584                                 | 0.154E-01 | 0.171    | 0.223E-02 |

|      |       |       |           |       |           |
|------|-------|-------|-----------|-------|-----------|
| 2.0  | 0.178 | 0.531 | 0.123E-01 | 0.166 | 0.150E-02 |
| 2.2  | 0.143 | 0.448 | 0.993E-02 | 0.170 | 0.289E-02 |
| 2.5  | 0.131 | 0.388 | 0.762E-02 | 0.157 | 0.257E-02 |
| 2.7  | 0.125 | 0.365 | 0.636E-02 | 0.161 | 0.248E-02 |
| 3.0  | 0.126 | 0.345 | 0.516E-02 | 0.153 | 0.145E-02 |
| 3.5  | 0.113 | 0.303 | 0.360E-02 | 0.164 | 0.118E-02 |
| 4.0  | 0.111 | 0.277 | 0.280E-02 | 0.158 | 0.115E-02 |
| 5.0  | 0.104 | 0.236 | 0.199E-02 | 0.148 | 0.870E-03 |
| 8.0  | 0.094 | 0.187 | 0.605E-03 | 0.123 | 0.187E-03 |
| 10.0 | 0.089 | 0.165 | 0.321E-03 | 0.082 | 0.171E-03 |

<sup>a</sup> The mean residual sum of squares,  $R_1 = \frac{1}{n} \sum_{i=1}^n \frac{(Y_{\text{exp}} - Y_{\text{calc}})^2}{Y_{\text{exp}}^2}$

**Table S3.** Best fit parameters of the one-component Debye model for the Cole-Cole plot of complex **2** at  $H_{DC}=2500$  Oe

| $T, K$ | $\chi_s, \text{cm}^3 \text{mol}^{-1}$ | $\chi_T, \text{cm}^3 \text{mol}^{-1}$ | $\tau, s$ | $\alpha$ | $R_1^a$   |
|--------|---------------------------------------|---------------------------------------|-----------|----------|-----------|
| 6      | 0.153                                 | 0.262                                 | 0.678E-03 | 0.124    | 0.654E-03 |
| 7      | 0.136                                 | 0.244                                 | 0.608E-03 | 0.084    | 0.175E-03 |
| 8      | 0.121                                 | 0.216                                 | 0.465E-03 | 0.072    | 0.185E-03 |
| 9      | 0.110                                 | 0.191                                 | 0.355E-03 | 0.039    | 0.850E-04 |
| 10     | 0.100                                 | 0.173                                 | 0.276E-03 | 0.029    | 0.113E-03 |
| 11     | 0.090                                 | 0.158                                 | 0.212E-03 | 0.048    | 0.610E-03 |
| 12     | 0.084                                 | 0.144                                 | 0.179E-03 | 0.029    | 0.633E-03 |
| 13     | 0.079                                 | 0.133                                 | 0.135E-03 | 0.039    | 0.163E-03 |
| 14     | 0.073                                 | 0.124                                 | 0.110E-03 | 0.059    | 0.257E-03 |
| 15     | 0.068                                 | 0.116                                 | 0.893E-04 | 0.010    | 0.148E-03 |
| 16     | 0.065                                 | 0.109                                 | 0.721E-04 | 0.018    | 0.899E-04 |

|    |       |       |           |       |           |
|----|-------|-------|-----------|-------|-----------|
| 17 | 0.062 | 0.103 | 0.660E-04 | 0.028 | 0.656E-04 |
| 18 | 0.059 | 0.098 | 0.523E-04 | 0.041 | 0.194E-03 |
| 19 | 0.056 | 0.092 | 0.459E-04 | 0.065 | 0.216E-03 |
| 20 | 0.053 | 0.088 | 0.400E-04 | 0.059 | 0.145E-03 |

<sup>a</sup> The mean residual sum of squares,  $R_1 = \frac{1}{n} \sum_{i=1}^n \frac{(Y_{\text{exp}} - Y_{\text{calc}})^2}{Y_{\text{exp}}^2}$

**Table S4.** Total energies ( $E_{\text{tot}}$ , a.u.) for the structures of compound **L1**, **L2**, **1a-1c**, **2-2b** and  $\text{Cu}(\text{hfac})_2$  optimized at the DFT B3LYP/6-311++G(d,p) level of theory.

| Structure                  | $E_{\text{tot}}$ |
|----------------------------|------------------|
| <b>L1</b>                  | -1266.696503     |
| <b>L2</b>                  | -1581.285426     |
| $\text{Cu}(\text{hfac})_2$ | -3522.415768     |
| <b>1a</b>                  | -9578.264993     |
| <b>1b</b>                  | -8311.561341     |
| <b>1c</b>                  | -4789.131488     |
| <b>2</b>                   | -8626.152444     |
| <b>2a</b>                  | -5103.721477     |
| <b>2b</b>                  | -6685.002512     |
